# Supplementary material for: The Role of Birthplace Diversity in Shaping Education Gradients in Trust: Country and Regional Level Mediation-Moderation Analyses
Source: Springer Nature journal article supplement (doi:10.1007/s11205-022-02948-z), 2022-06-09
Supplement: MOESM1 [file 23146086]

## APPENDIX

**Table A1. Descriptive statistics of trust indicators**

|                 | Trust only few<br>people |      | Other people take<br>advantage |      | Combined |      |
|-----------------|--------------------------|------|--------------------------------|------|----------|------|
|                 | mean                     | sd   | mean                           | sd   | mean     | sd   |
| Australia       | 2.38                     | 1.13 | 2.22                           | 1.00 | 4.60     | 1.87 |
| Austria         | 2.20                     | 1.22 | 2.16                           | 1.14 | 4.36     | 2.07 |
| Belgium         | 2.30                     | 1.05 | 2.39                           | 1.03 | 4.69     | 1.80 |
| Canada          | 2.45                     | 1.17 | 2.27                           | 1.03 | 4.72     | 1.89 |
| Chile           | 2.04                     | 1.13 | 1.86                           | 1.05 | 3.90     | 1.84 |
| Czech Republic  | 1.98                     | 0.82 | 1.96                           | 0.76 | 3.94     | 1.38 |
| Denmark         | 3.09                     | 1.26 | 2.99                           | 1.17 | 6.09     | 2.17 |
| Estonia         | 2.00                     | 0.92 | 2.09                           | 0.91 | 4.09     | 1.57 |
| Finland         | 2.59                     | 1.27 | 2.94                           | 1.15 | 5.54     | 2.03 |
| France          | 1.90                     | 1.05 | 2.09                           | 1.12 | 3.99     | 1.80 |
| Germany         | 2.20                     | 1.04 | 2.15                           | 0.95 | 4.34     | 1.76 |
| Greece          | 1.96                     | 0.90 | 1.83                           | 0.83 | 3.79     | 1.57 |
| Ireland         | 2.12                     | 1.06 | 2.12                           | 1.00 | 4.25     | 1.77 |
| Israel          | 2.41                     | 1.33 | 2.26                           | 1.25 | 4.67     | 2.28 |
| Italy           | 1.86                     | 0.99 | 1.83                           | 0.96 | 3.69     | 1.78 |
| Japan           | 2.31                     | 1.05 | 3.00                           | 1.04 | 5.31     | 1.68 |
| Lithuania       | 2.34                     | 1.09 | 2.04                           | 0.95 | 4.37     | 1.73 |
| Netherlands     | 2.68                     | 1.15 | 2.61                           | 1.05 | 5.29     | 1.92 |
| New Zealand     | 2.45                     | 1.18 | 2.31                           | 1.04 | 4.76     | 1.93 |
| Norway          | 2.74                     | 1.44 | 2.70                           | 1.26 | 5.45     | 2.37 |
| Poland          | 2.24                     | 0.96 | 1.98                           | 0.78 | 4.22     | 1.51 |
| Singapore       | 2.38                     | 1.00 | 2.22                           | 0.95 | 4.60     | 1.64 |
| Slovak Republic | 1.94                     | 0.86 | 1.93                           | 0.87 | 3.87     | 1.48 |
| Slovenia        | 2.13                     | 0.96 | 1.89                           | 0.82 | 4.02     | 1.57 |
| South Korea     | 2.22                     | 0.93 | 2.15                           | 0.92 | 4.37     | 1.56 |
| Spain           | 2.28                     | 1.17 | 2.20                           | 1.13 | 4.48     | 1.99 |
| Sweden          | 2.70                     | 1.29 | 3.05                           | 1.19 | 5.76     | 2.12 |
| United Kingdom  | 2.23                     | 1.11 | 2.15                           | 1.00 | 4.38     | 1.84 |
| United States   | 2.34                     | 1.21 | 2.07                           | 1.00 | 4.41     | 1.91 |
| Total           | 2.25                     | 1.13 | 2.23                           | 1.06 | 4.48     | 1.88 |
| N               | 155601                   |      | 155594                         |      | 155457   |      |

**Table A2. Descriptive statistics of core independent variables**

|               | Education |      | Cognitive ability |       | SES    |      |
|---------------|-----------|------|-------------------|-------|--------|------|
|               | mean      | sd   | mean              | sd    | mean   | sd   |
| Australia     | 14.48     | 2.68 | 279.54            | 51.53 | 0.05   | 0.92 |
| Austria       | 12.43     | 2.41 | 267.86            | 43.98 | -0.01  | 0.90 |
| Belgium       | 12.58     | 2.93 | 273.73            | 47.83 | 0.02   | 0.92 |
| Canada        | 13.57     | 2.70 | 272.85            | 51.44 | 0.12   | 0.91 |
| Chile         | 11.57     | 3.51 | 215.62            | 52.78 | -0.22  | 0.95 |
| Czech Rep.    | 13.27     | 2.60 | 272.73            | 40.92 | -0.11  | 0.88 |
| Denmark       | 12.93     | 2.65 | 269.69            | 48.81 | 0.07   | 0.90 |
| Estonia       | 12.29     | 2.72 | 273.45            | 44.86 | -0.06  | 0.91 |
| Finland       | 12.60     | 3.11 | 285.67            | 51.88 | -0.01  | 0.90 |
| France        | 11.21     | 3.74 | 259.44            | 49.84 | -0.07  | 0.93 |
| Germany       | 13.19     | 2.66 | 268.08            | 47.73 | -0.02  | 0.91 |
| Greece        | 11.82     | 3.64 | 253.08            | 46.62 | -0.11  | 0.86 |
| Ireland       | 14.59     | 3.36 | 265.69            | 48.35 | -0.09  | 0.89 |
| Israel        | 13.10     | 2.88 | 253.14            | 57.37 | 0.17   | 0.92 |
| Italy         | 10.61     | 4.01 | 248.74            | 44.67 | -0.20  | 0.87 |
| Japan         | 13.18     | 2.36 | 295.72            | 40.40 | -0.08  | 0.88 |
| Lithuania     | 13.53     | 2.41 | 264.18            | 41.73 | -0.14  | 0.91 |
| Netherlands   | 13.42     | 2.72 | 281.83            | 49.44 | 0.16   | 0.94 |
| New Zealand   | 13.99     | 2.60 | 281.37            | 48.15 | 0.11   | 0.93 |
| Norway        | 14.39     | 2.52 | 279.19            | 47.76 | 0.12   | 0.89 |
| Poland        | 12.75     | 3.10 | 263.77            | 48.68 | -0.08  | 0.89 |
| Singapore     | 11.78     | 3.28 | 251.57            | 60.55 | 0.09   | 0.97 |
| Slovak Rep.   | 13.23     | 2.78 | 273.38            | 40.16 | -0.16  | 0.89 |
| Slovenia      | 10.43     | 2.02 | 253.70            | 48.83 | -0.06  | 0.96 |
| South Korea   | 12.84     | 3.31 | 268.53            | 42.01 | -0.19  | 0.88 |
| Spain         | 11.36     | 3.66 | 250.15            | 49.67 | -0.21  | 0.93 |
| Sweden        | 12.34     | 2.58 | 278.43            | 51.57 | 0.00   | 0.93 |
| UK            | 13.13     | 2.29 | 273.92            | 49.34 | -0.04  | 0.95 |
| United States | 13.67     | 3.05 | 269.42            | 50.52 | 0.06   | 0.94 |
| Total         | 12.87     | 3.20 | 269.26            | 50.09 | 0.05   | 0.92 |
| N             | 154133    |      | 155991            |       | 155991 |      |

**Table A3 Descriptive statistics of control variables**

|                | Female |      | Age    |       | NEET   |      | Migrant status |      | Parental SES |      |
|----------------|--------|------|--------|-------|--------|------|----------------|------|--------------|------|
|                | mean   | sd   | mean   | sd    | mean   | sd   | mean           | sd   | mean         | sd   |
| Australia      | 0.51   | 0.50 | 43.78  | 11.40 | 0.19   | 0.39 | 0.30           | 0.46 | -0.19        | 1.16 |
| Austria        | 0.50   | 0.50 | 44.44  | 11.01 | 0.19   | 0.39 | 0.19           | 0.39 | -0.14        | 1.06 |
| Belgium        | 0.49   | 0.50 | 45.44  | 11.15 | 0.18   | 0.38 | 0.07           | 0.26 | -0.39        | 1.12 |
| Canada         | 0.50   | 0.50 | 44.68  | 11.30 | 0.15   | 0.36 | 0.29           | 0.45 | 0.07         | 1.18 |
| Chile          | 0.50   | 0.50 | 43.05  | 11.36 | 0.15   | 0.36 | 0.04           | 0.19 | -0.66        | 1.14 |
| Czech Republic | 0.50   | 0.50 | 44.29  | 11.62 | 0.23   | 0.42 | 0.05           | 0.22 | 0.38         | 0.82 |
| Denmark        | 0.50   | 0.50 | 45.22  | 11.28 | 0.14   | 0.35 | 0.11           | 0.32 | 0.07         | 1.17 |
| Estonia        | 0.53   | 0.50 | 44.15  | 11.50 | 0.18   | 0.38 | 0.17           | 0.38 | 0.32         | 1.15 |
| Finland        | 0.50   | 0.50 | 45.56  | 11.68 | 0.16   | 0.36 | 0.05           | 0.22 | -0.22        | 1.08 |
| France         | 0.51   | 0.50 | 44.89  | 11.35 | 0.25   | 0.43 | 0.14           | 0.35 | -0.45        | 1.13 |
| Germany        | 0.50   | 0.50 | 44.79  | 10.87 | 0.15   | 0.36 | 0.17           | 0.37 | 0.33         | 1.02 |
| Greece         | 0.51   | 0.50 | 44.33  | 11.02 | 0.42   | 0.49 | 0.07           | 0.25 | -0.90        | 1.04 |
| Ireland        | 0.51   | 0.50 | 42.71  | 11.08 | 0.24   | 0.43 | 0.19           | 0.39 | -0.52        | 1.12 |
| Israel         | 0.51   | 0.50 | 42.69  | 11.49 | 0.17   | 0.38 | 0.30           | 0.46 | 0.18         | 1.32 |
| Italy          | 0.51   | 0.50 | 44.57  | 11.15 | 0.34   | 0.47 | 0.08           | 0.26 | -1.00        | 0.89 |
| Japan          | 0.50   | 0.50 | 45.25  | 11.60 | 0.19   | 0.40 | 0.00           | 0.04 | 0.01         | 1.11 |
| Lithuania      | 0.53   | 0.50 | 44.86  | 11.23 | 0.26   | 0.44 | 0.03           | 0.17 | -0.01        | 1.31 |
| Netherlands    | 0.50   | 0.50 | 45.06  | 11.18 | 0.15   | 0.36 | 0.14           | 0.34 | -0.37        | 1.13 |
| New Zealand    | 0.52   | 0.50 | 44.57  | 11.16 | 0.11   | 0.31 | 0.33           | 0.47 | 0.03         | 1.20 |
| Norway         | 0.49   | 0.50 | 44.33  | 11.28 | 0.12   | 0.32 | 0.14           | 0.35 | 0.18         | 1.15 |
| Poland         | 0.51   | 0.50 | 43.81  | 11.80 | 0.29   | 0.45 | 0.00           | 0.03 | -0.16        | 1.06 |
| Singapore      | 0.51   | 0.50 | 44.41  | 11.09 | 0.14   | 0.35 | 0.32           | 0.47 | -0.81        | 1.03 |
| Slovak Rep.    | 0.50   | 0.50 | 43.61  | 11.48 | 0.29   | 0.46 | 0.02           | 0.13 | -0.14        | 0.99 |
| Slovenia       | 0.49   | 0.50 | 44.80  | 11.38 | 0.25   | 0.44 | 0.14           | 0.35 | -0.33        | 1.10 |
| South Korea    | 0.49   | 0.50 | 43.69  | 10.68 | 0.17   | 0.38 | 0.01           | 0.10 | -0.64        | 1.02 |
| Spain          | 0.50   | 0.50 | 43.96  | 10.96 | 0.26   | 0.44 | 0.12           | 0.33 | -0.81        | 0.97 |
| Sweden         | 0.50   | 0.50 | 45.10  | 11.56 | 0.12   | 0.32 | 0.19           | 0.39 | 0.03         | 1.22 |
| UK             | 0.50   | 0.50 | 44.09  | 11.36 | 0.18   | 0.39 | 0.15           | 0.36 | -0.04        | 1.14 |
| United States  | 0.52   | 0.50 | 44.24  | 11.31 | 0.16   | 0.37 | 0.16           | 0.37 | 0.22         | 1.15 |
| Total          | 0.51   | 0.50 | 44.42  | 11.29 | 0.20   | 0.40 | 0.12           | 0.32 | -0.11        | 1.17 |
| N              | 157956 |      | 157956 |       | 155925 |      | 145866         |      | 145866       |      |

**Table A4. Percent of missing data and total sample size**

|                | Trust | Edu-<br>cation | Occup.<br>prestige | Income* | NEET | Migrant<br>status | SES  | N      |
|----------------|-------|----------------|--------------------|---------|------|-------------------|------|--------|
| Australia      | 1.9   | 1.9            | 12.6               | 40.7    | 1.6  | 2.1               | 15.2 | 6577   |
| Austria        | 2.6   | 2.3            | 10.3               | 29.3    | 2.3  | 10.5              | 5.4  | 4232   |
| Belgium        | 9.6   | 9.4            | 22.2               | 38.6    | 9.4  | 13.6              | 14.1 | 4469   |
| Canada         | 0.3   | 0.9            | 10.8               | 29.3    | 0.0  | 6.3               | 8.7  | 22063  |
| Chile          | 0.9   | 0.5            | 13.7               | 51.4    | 0.5  | 2.8               | 11.0 | 4154   |
| Czech Republic | 0.5   | 0.4            | 11.8               | 43.2    | 0.5  | 8.4               | 4.9  | 4622   |
| Denmark        | 1.2   | 0.5            | 9.5                | 26.8    | 0.6  | 3.5               | 1.8  | 4396   |
| Estonia        | 0.9   | 0.6            | 9.7                | 37.3    | 0.7  | 14.2              | 8.1  | 6258   |
| Finland        | 0.9   | 0.0            | 8.1                | 26.7    | 0.1  | 2.0               | 2.4  | 5055   |
| France         | 2.6   | 1.6            | 12.6               | 35.6    | 1.3  | 8.7               | 19.6 | 6277   |
| Germany        | 2.1   | 1.9            | 8.9                | 26.7    | 1.8  | 15.2              | 9.5  | 4569   |
| Greece         | 0.2   | 0.2            | 25.4               | 72.7    | 0.2  | 3.0               | 0.8  | 5894   |
| Ireland        | 0.6   | 0.3            | 15.6               | 42.0    | 0.4  | 5.0               | 5.4  | 7662   |
| Israel         | 5.3   | 4.1            | 21.8               | 47.6    | 4.1  | 17.8              | 14.5 | 4244   |
| Italy          | 0.9   | 0.7            | 20.1               | 44.1    | 0.8  | 2.6               | 1.8  | 5229   |
| Japan          | 2.0   | 2.0            | 17.2               | 26.8    | 2.2  | 4.5               | 8.5  | 4182   |
| Lithuania      | 1.0   | 0.9            | 16.2               | 42.4    | 0.9  | 7.1               | 2.5  | 4095   |
| Netherlands    | 2.0   | 1.9            | 12.1               | 29.6    | 1.9  | 6.4               | 4.3  | 4493   |
| New Zealand    | 1.8   | 2.0            | 10.4               | 41.0    | 1.8  | 12.7              | 14.7 | 5601   |
| Norway         | 4.6   | 4.0            | 20.3               | 20.3    | 4.0  | 7.7               | 5.6  | 4408   |
| Poland         | 0.2   | 0.0            | 18.1               | 44.6    | 0.1  | 4.4               | 3.3  | 4276   |
| Singapore      | 1.7   | 1.6            | 11.0               | 33.0    | 1.6  | 20.3              | 3.1  | 4151   |
| Slovak Rep.    | 0.8   | 0.4            | 17.1               | 41.9    | 0.5  | 6.0               | 1.7  | 4886   |
| Slovenia       | 1.3   | 0.8            | 18.2               | 51.8    | 0.9  | 8.2               | 5.2  | 4893   |
| South Korea    | 0.4   | 0.2            | 15.6               | 30.0    | 0.4  | 1.7               | 1.4  | 4392   |
| Spain          | 1.8   | 1.6            | 15.6               | 48.2    | 1.6  | 3.3               | 5.7  | 4583   |
| Sweden         | 0.9   | 0.0            | 7.0                | 19.9    | 0.0  | 6.9               | 4.9  | 4495   |
| UK             | 1.1   | 14.9           | 18.6               | 35.9    | 1.2  | 8.3               | 16.6 | 3627   |
| United States  | 2.2   | 14.6           | 10.4               | 32.9    | 2.2  | 6.5               | 6.6  | 4173   |
| Total          | 1.6   | 2.4            | 14.0               | 36.6    | 1.3  | 7.3               | 7.7  | 157956 |

Note: Female, age and cognitive abilities without missing data.

\*The high percentage of missing is due to the fact that income is missing for all individuals who are not in the labor force (around 30% in the pooled sample). Item non response is considerably lower and corresponds to 5% in the pooled sample.

**Table A5. Direct and indirect effect of education by country**

| Country         | Direct effect<br>Est. | Through SES<br>Est. | Thorough Lit.<br>Est. | Total<br>Est. |
|-----------------|-----------------------|---------------------|-----------------------|---------------|
| Australia       | 0.178 **              | 0.063 **            | 0.051 **              | 0.292 **      |
| Austria         | 0.192 **              | 0.006               | 0.072 **              | 0.270 **      |
| Belgium         | 0.199 **              | 0.083 **            | 0.032 *               | 0.314 **      |
| Canada          | 0.096 **              | 0.043 **            | 0.048 **              | 0.188 **      |
| Chile           | 0.052                 | 0.074 **            | -0.019                | 0.108 **      |
| Czech Republic  | 0.143 **              | 0.010               | 0.030 †               | 0.183 **      |
| Denmark         | 0.184 **              | 0.133 **            | 0.077 **              | 0.393 **      |
| Estonia         | 0.093 **              | 0.056 **            | 0.019 *               | 0.168 **      |
| Finland         | 0.182 **              | 0.060 **            | -0.003                | 0.239 **      |
| France          | 0.077 **              | 0.070 **            | 0.036 *               | 0.184 **      |
| Germany         | 0.132 **              | 0.089 **            | 0.062 **              | 0.283 **      |
| Greece          | 0.106 **              | 0.017               | 0.019                 | 0.142 **      |
| Ireland         | 0.132 **              | 0.019               | 0.027 *               | 0.178 **      |
| Israel          | 0.057                 | 0.102 **            | 0.050 **              | 0.210 **      |
| Italy           | 0.061 *               | 0.044 **            | 0.025 *               | 0.130 **      |
| Japan           | 0.137 **              | 0.032 **            | 0.016                 | 0.185 **      |
| Lithuania       | 0.085 *               | 0.081 **            | 0.026                 | 0.191 **      |
| Netherlands     | 0.181 **              | 0.051 **            | 0.110 **              | 0.342 **      |
| New Zealand     | 0.096 **              | 0.043 **            | 0.082 **              | 0.221 **      |
| Norway          | 0.152 **              | 0.128 **            | 0.101 **              | 0.381 **      |
| Poland          | 0.040                 | 0.070 **            | 0.027 †               | 0.136 **      |
| Singapore       | 0.023                 | 0.046 *             | -0.068 **             | 0.001         |
| Slovak Republic | 0.089 *               | 0.019               | -0.005                | 0.102 *       |
| Slovenia        | 0.097 *               | 0.159 **            | 0.091 **              | 0.347 **      |
| South Korea     | 0.067 **              | 0.037 **            | 0.002                 | 0.106 **      |
| Spain           | 0.137 **              | 0.069 **            | -0.016                | 0.190 **      |
| Sweden          | 0.106 **              | 0.091 **            | 0.078 **              | 0.275 **      |
| United Kingdom  | 0.191 **              | 0.033 *             | 0.050 **              | 0.274 **      |
| United States   | 0.124 **              | 0.035 *             | 0.052 *               | 0.211 **      |

Note: based on 10 multiple imputed datasets; \*\*p<0.01; \*p<0.05; †p<0.1  
p-values computed using 10,000 bootstrap replications.

**Table A6. Final models with significant effects only and between diversity (iteratively until all coef. significant)**

|                                     | Model 3a (Country) |         | Model 3b (Regional) |         |
|-------------------------------------|--------------------|---------|---------------------|---------|
|                                     | Est.               | s.e.    | Est.                | s.e.    |
| <b>Within group level paths</b>     |                    |         |                     |         |
| SES ← Education                     | 0.570**            | (0.023) | 0.552**             | (0.015) |
| Literacy ← Education                | 0.507**            | (0.023) | 0.468**             | (0.012) |
| Trust ← Education                   | 0.116**            | (0.009) | 0.120**             | (0.009) |
| Trust ← SES                         | 0.099**            | (0.010) | 0.100**             | (0.010) |
| Trust ← Literacy                    | 0.070**            | (0.010) | 0.078**             | (0.009) |
| Trust ← NEET                        | -0.108**           | (0.016) | -0.122**            | (0.014) |
| Trust ← Migrant                     | -0.059**           | (0.023) | -0.054**            | (0.020) |
| Trust ← Age                         | 0.056**            | (0.008) | 0.051**             | (0.008) |
| Trust ← Female                      | 0.133**            | (0.019) | 0.129**             | (0.014) |
| Trust ← Parental SES                | 0.070**            | (0.006) | 0.060**             | (0.005) |
| <b>Between group level paths</b>    |                    |         |                     |         |
| SES ← Education                     | ---                | ---     | 0.681**             | (0.123) |
| Literacy ← Education                | ---                | ---     | 0.410*              | (0.012) |
| Trust ← Literacy                    | 0.426**            | (0.152) | ---                 | ---     |
| Trust ← GDP                         | 0.105**            | (0.027) | ---                 | ---     |
| <b>Cross level interactions</b>     |                    |         |                     |         |
| Trust ← Education*Diversity         | ---                | ---     | 0.020*              | (0.010) |
| Trust ← Literacy*Diversity          | 0.024**            | (0.009) | 0.022*              | (0.010) |
| Trust ← Education*GDP               | 0.105**            | (0.027) | ---                 | ---     |
| Trust ← Literacy*GINI               | -0.043**           | (0.012) | ---                 | ---     |
| <b>Variance components (in SD)</b>  |                    |         |                     |         |
| Trust                               | 0.225**            | (0.027) | 0.081**             | (0.008) |
| SES                                 | 0.192**            | (0.029) | 0.095**             | (0.008) |
| Literacy                            | 0.267**            | (0.047) | 0.124**             | (0.015) |
| (Trust ← Education)                 | 0.050**            | (0.005) | 0.077**             | (0.008) |
| (Trust ← SES)                       | 0.045**            | (0.006) | 0.091**             | (0.010) |
| (Trust ← Literacy)                  | 0.048**            | (0.007) | 0.075**             | (0.009) |
| <b>Effect of education on trust</b> |                    |         |                     |         |
| Total indirect within               | 0.092**            | (0.009) | 0.092**             | (0.007) |
| (through SES)                       | 0.056**            | (0.006) | 0.055**             | (0.006) |
| (through literacy)                  | 0.036**            | (0.005) | 0.036**             | (0.004) |
| Total within (dir + indir)          | 0.208**            | (0.013) | 0.211**             | (0.010) |
| <b>Summary</b>                      |                    |         |                     |         |
| Sample-Size Adj. BIC                | 1163371.825        |         | 1005876.876         |         |

Note: \*\*p<0.01; \*p<0.05; †p<0.1

**Table A7. Robustness checks for model 1a**

| Parameters          | Level             | Initial model |        | Without NEET |        | Difrent edu |        | SES=Income |        | SES=SIOPS |        |       |
|---------------------|-------------------|---------------|--------|--------------|--------|-------------|--------|------------|--------|-----------|--------|-------|
|                     |                   | est           | pval   | est          | pval   | est         | pval   | est        | pval   | est       | pval   |       |
| Trust on            | NEET              | Within        | -0.108 | 0.000        | ...    | ...         | -0.120 | 0.000      | -0.112 | 0.000     | -0.112 | 0.000 |
| Trust on            | MIG               | Within        | -0.059 | 0.010        | -0.058 | 0.010       | -0.056 | 0.006      | -0.064 | 0.006     | -0.064 | 0.006 |
| Trust on            | AGE               | Within        | 0.056  | 0.000        | 0.051  | 0.000       | 0.053  | 0.000      | 0.061  | 0.000     | 0.061  | 0.000 |
| Trust on            | FEMALE            | Within        | 0.133  | 0.000        | 0.129  | 0.000       | 0.129  | 0.000      | 0.126  | 0.000     | 0.126  | 0.000 |
| Trust on            | P_SES             | Within        | 0.070  | 0.000        | 0.070  | 0.000       | 0.073  | 0.000      | 0.075  | 0.000     | 0.075  | 0.000 |
| SES on              | Education         | Within        | 0.570  | 0.000        | 0.570  | 0.000       | 0.985  | 0.000      | 0.394  | 0.000     | 0.394  | 0.000 |
| Literacy on         | Education         | Within        | 0.507  | 0.000        | 0.507  | 0.000       | 0.788  | 0.000      | 0.507  | 0.000     | 0.507  | 0.000 |
| SES with            | Literacy          | Within        | 0.171  | 0.000        | 0.171  | 0.000       | 0.236  | 0.000      | 0.159  | 0.000     | 0.159  | 0.000 |
| Residual.Variiances | Trust             | Within        | 0.849  | 0.000        | 0.849  | 0.000       | 0.848  | 0.000      | 0.852  | 0.000     | 0.852  | 0.000 |
| Residual.Variiances | SES               | Within        | 0.688  | 0.000        | 0.688  | 0.000       | 0.741  | 0.000      | 0.845  | 0.000     | 0.845  | 0.000 |
| Residual.Variiances | Literacy          | Within        | 0.655  | 0.000        | 0.655  | 0.000       | 0.732  | 0.000      | 0.655  | 0.000     | 0.655  | 0.000 |
| Trust on            | SES               | Between       | -0.294 | 0.361        | -0.270 | 0.409       | -0.805 | 0.014      | -0.454 | 0.013     | -0.454 | 0.013 |
| Trust on            | Literacy          | Between       | 0.548  | 0.001        | 0.544  | 0.002       | 0.659  | 0.000      | 0.543  | 0.001     | 0.543  | 0.001 |
| Trust on            | Education         | Between       | -0.195 | 0.159        | -0.186 | 0.177       | 1.488  | 0.000      | -0.176 | 0.168     | -0.176 | 0.168 |
| SES on              | Education         | Between       | 0.099  | 0.315        | 0.096  | 0.328       | 0.627  | 0.016      | 0.119  | 0.275     | 0.119  | 0.275 |
| Literacy on         | Education         | Between       | 0.114  | 0.362        | 0.102  | 0.389       | -0.355 | 0.287      | 0.162  | 0.193     | 0.162  | 0.193 |
| Trust on edu with   | SES               | Between       | 0.000  | 0.952        | 0.000  | 0.985       | 0.003  | 0.029      | -0.001 | 0.546     | -0.001 | 0.546 |
| Trust on edu with   | Literacy          | Between       | 0.007  | 0.020        | 0.008  | 0.022       | 0.003  | 0.240      | 0.007  | 0.013     | 0.007  | 0.013 |
| Trust on edu with   | Trust             | Between       | 0.005  | 0.018        | 0.005  | 0.019       | 0.010  | 0.001      | 0.006  | 0.028     | 0.006  | 0.028 |
| SES with            | Literacy          | Between       | 0.009  | 0.091        | 0.008  | 0.102       | 0.014  | 0.017      | 0.007  | 0.154     | 0.007  | 0.154 |
| Means               | Trust on edu      | Between       | 0.099  | 0.000        | 0.099  | 0.000       | 0.096  | 0.000      | 0.055  | 0.000     | 0.055  | 0.000 |
| Means               | Trust on literacy | Between       | 0.072  | 0.000        | 0.075  | 0.000       | 0.080  | 0.000      | 0.082  | 0.000     | 0.082  | 0.000 |
| Means               | Trust on edu      | Between       | 0.116  | 0.000        | 0.119  | 0.000       | 0.226  | 0.000      | 0.145  | 0.000     | 0.145  | 0.000 |
| Intercepts          | Trust             | Between       | -0.021 | 0.666        | -0.022 | 0.647       | -0.027 | 0.512      | -0.017 | 0.713     | -0.017 | 0.713 |
| Intercepts          | SES               | Between       | 0.034  | 0.170        | 0.034  | 0.169       | 0.029  | 0.195      | 0.026  | 0.376     | 0.026  | 0.376 |
| Intercepts          | Literacy          | Between       | 0.041  | 0.402        | 0.041  | 0.394       | 0.048  | 0.312      | 0.039  | 0.422     | 0.039  | 0.422 |
| Variiances          | Trust on SES      | Between       | 0.002  | 0.000        | 0.002  | 0.000       | 0.002  | 0.000      | 0.001  | 0.006     | 0.001  | 0.006 |
| Variiances          | Trust on lit.     | Between       | 0.004  | 0.001        | 0.004  | 0.001       | 0.005  | 0.001      | 0.005  | 0.000     | 0.005  | 0.000 |

| Parameters                               |                   |         | Initial model |       | Without NEET |       | Difrent edu |       | SES=Income |       | SES=SIOPS |       |
|------------------------------------------|-------------------|---------|---------------|-------|--------------|-------|-------------|-------|------------|-------|-----------|-------|
|                                          |                   | Level   | est           | pval  | est          | pval  | est         | pval  | est        | pval  | est       | pval  |
| Variances                                | Trust on edu with | Between | 0.003         | 0.000 | 0.003        | 0.000 | 0.005       | 0.001 | 0.003      | 0.000 | 0.003     | 0.000 |
| Residual.Variances                       | Trust             | Between | 0.063         | 0.000 | 0.063        | 0.000 | 0.047       | 0.001 | 0.058      | 0.000 | 0.058     | 0.000 |
| Residual.Variances                       | SES               | Between | 0.019         | 0.004 | 0.019        | 0.004 | 0.016       | 0.003 | 0.028      | 0.008 | 0.028     | 0.008 |
| Residual.Variances                       | Literacy          | Between | 0.066         | 0.026 | 0.066        | 0.027 | 0.072       | 0.034 | 0.066      | 0.024 | 0.066     | 0.024 |
| Effect through SES                       |                   | Within  | 0.056         | 0.000 | 0.057        | 0.000 | 0.095       | 0.000 | 0.022      | 0.000 | 0.022     | 0.000 |
| Effect through literacy                  |                   | Within  | 0.037         | 0.000 | 0.038        | 0.000 | 0.063       | 0.000 | 0.042      | 0.000 | 0.042     | 0.000 |
| Effect through SES                       |                   | Between | -0.029        | 0.546 | -0.026       | 0.574 | -0.505      | 0.146 | -0.054     | 0.348 | -0.054    | 0.348 |
| Effect through literacy                  |                   | Between | 0.062         | 0.324 | 0.055        | 0.352 | -0.234      | 0.272 | 0.088      | 0.144 | 0.088     | 0.144 |
| Contrast of the Within indirect effects  |                   | Within  | 0.020         | 0.012 | 0.019        | 0.018 | 0.032       | 0.019 | -0.020     | 0.006 | -0.020    | 0.006 |
| Contrast of the Between indirect effects |                   | Between | -0.091        | 0.342 | -0.081       | 0.369 | -0.270      | 0.527 | -0.142     | 0.160 | -0.142    | 0.160 |
| Total indirect                           |                   | Within  | 0.093         | 0.000 | 0.095        | 0.000 | 0.158       | 0.000 | 0.064      | 0.000 | 0.064     | 0.000 |
| Total indirect                           |                   | Between | 0.033         | 0.570 | 0.029        | 0.601 | -0.739      | 0.056 | 0.034      | 0.576 | 0.034     | 0.576 |
| Variance components (in SD)              | Trust on edu      | Between | 0.051         | 0.000 | 0.052        | 0.000 | 0.074       | 0.000 | 0.056      | 0.000 | 0.056     | 0.000 |
| Variance components (in SD)              | Trust on SES      | Between | 0.044         | 0.000 | 0.044        | 0.000 | 0.045       | 0.000 | 0.036      | 0.000 | 0.036     | 0.000 |
| Variance components (in SD)              | Trust on lit.     | Between | 0.064         | 0.000 | 0.064        | 0.000 | 0.067       | 0.000 | 0.068      | 0.000 | 0.068     | 0.000 |
| Variance components (in SD)              | Trust             | Between | 0.251         | 0.000 | 0.252        | 0.000 | 0.216       | 0.000 | 0.241      | 0.000 | 0.241     | 0.000 |
| Variance components (in SD)              | SES               | Between | 0.137         | 0.000 | 0.136        | 0.000 | 0.125       | 0.000 | 0.167      | 0.000 | 0.167     | 0.000 |
| Variance components (in SD)              | Literacy          | Between | 0.257         | 0.000 | 0.256        | 0.000 | 0.268       | 0.000 | 0.256      | 0.000 | 0.256     | 0.000 |
| Total                                    |                   | Within  | 0.209         | 0.000 | 0.214        | 0.000 | 0.384       | 0.000 | 0.209      | 0.000 | 0.209     | 0.000 |



**Table A8. Robustness checks for model 1b**

| Parameters        | Level             | Initial model |        | Without NEET |        | Difrent edu |        | SES=Income |        | SES=SIOPS |        |       |
|-------------------|-------------------|---------------|--------|--------------|--------|-------------|--------|------------|--------|-----------|--------|-------|
|                   |                   | est           | pval   | est          | pval   | est         | pval   | est        | pval   | est       | pval   |       |
| Trust on          | NEET              | Within        | -0.122 | 0.000        | ...    | ...         | -0.136 | 0.000      | -0.129 | 0.000     | -0.129 | 0.000 |
| Trust on          | MIG               | Within        | -0.055 | 0.006        | -0.056 | 0.005       | -0.054 | 0.004      | -0.063 | 0.002     | -0.063 | 0.002 |
| Trust on          | AGE               | Within        | 0.051  | 0.000        | 0.045  | 0.000       | 0.048  | 0.000      | 0.058  | 0.000     | 0.058  | 0.000 |
| Trust on          | FEMALE            | Within        | 0.128  | 0.000        | 0.124  | 0.000       | 0.125  | 0.000      | 0.123  | 0.000     | 0.123  | 0.000 |
| Trust on          | P_SES             | Within        | 0.060  | 0.000        | 0.060  | 0.000       | 0.064  | 0.000      | 0.066  | 0.000     | 0.066  | 0.000 |
| SES on            | Education         | Within        | 0.552  | 0.000        | 0.552  | 0.000       | 0.977  | 0.000      | 0.369  | 0.000     | 0.369  | 0.000 |
| Literacy on       | Education         | Within        | 0.468  | 0.000        | 0.468  | 0.000       | 0.743  | 0.000      | 0.468  | 0.000     | 0.468  | 0.000 |
| SES with          | Literacy          | Within        | 0.162  | 0.000        | 0.162  | 0.000       | 0.216  | 0.000      | 0.150  | 0.000     | 0.150  | 0.000 |
| Residual.Variaces | Trust             | Within        | 0.840  | 0.000        | 0.841  | 0.000       | 0.839  | 0.000      | 0.843  | 0.000     | 0.843  | 0.000 |
| Residual.Variaces | SES               | Within        | 0.686  | 0.000        | 0.686  | 0.000       | 0.730  | 0.000      | 0.847  | 0.000     | 0.847  | 0.000 |
| Residual.Variaces | Literacy          | Within        | 0.626  | 0.000        | 0.626  | 0.000       | 0.689  | 0.000      | 0.627  | 0.000     | 0.627  | 0.000 |
| Trust on          | SES               | Between       | 0.202  | 0.055        | 0.217  | 0.044       | 0.193  | 0.127      | 0.153  | 0.060     | 0.153  | 0.060 |
| Trust on          | Literacy          | Between       | 0.132  | 0.173        | 0.139  | 0.149       | 0.108  | 0.273      | 0.128  | 0.184     | 0.128  | 0.184 |
| Trust on          | Education         | Between       | -0.328 | 0.020        | -0.338 | 0.019       | -0.657 | 0.055      | -0.264 | 0.027     | -0.264 | 0.027 |
| SES on            | Education         | Between       | 0.661  | 0.000        | 0.701  | 0.000       | 1.775  | 0.000      | 0.512  | 0.003     | 0.512  | 0.003 |
| Literacy on       | Education         | Between       | 0.398  | 0.015        | 0.450  | 0.005       | 0.814  | 0.029      | 0.392  | 0.017     | 0.392  | 0.017 |
| Trust on edu with | SES               | Between       | 0.001  | 0.383        | 0.001  | 0.440       | 0.001  | 0.525      | 0.001  | 0.364     | 0.001  | 0.364 |
| Trust on edu with | Literacy          | Between       | 0.001  | 0.452        | 0.001  | 0.475       | 0.002  | 0.467      | 0.001  | 0.442     | 0.001  | 0.442 |
| Trust on edu with | Trust             | Between       | 0.000  | 0.780        | 0.000  | 0.793       | -0.001 | 0.746      | 0.000  | 0.694     | 0.000  | 0.694 |
| SES with          | Literacy          | Between       | 0.003  | 0.073        | 0.003  | 0.083       | 0.005  | 0.021      | 0.004  | 0.106     | 0.004  | 0.106 |
| Means             | Trust on edu      | Between       | 0.099  | 0.000        | 0.099  | 0.000       | 0.098  | 0.000      | 0.056  | 0.000     | 0.056  | 0.000 |
| Means             | Trust on literacy | Between       | 0.077  | 0.000        | 0.081  | 0.000       | 0.086  | 0.000      | 0.087  | 0.000     | 0.087  | 0.000 |
| Means             | Trust on edu      | Between       | 0.121  | 0.000        | 0.125  | 0.000       | 0.255  | 0.000      | 0.148  | 0.000     | 0.148  | 0.000 |
| Intercepts        | Trust             | Between       | -0.002 | 0.819        | -0.002 | 0.834       | -0.002 | 0.799      | -0.002 | 0.817     | -0.002 | 0.817 |
| Intercepts        | SES               | Between       | -0.017 | 0.087        | -0.016 | 0.110       | -0.008 | 0.447      | -0.022 | 0.115     | -0.022 | 0.115 |
| Intercepts        | Literacy          | Between       | -0.005 | 0.684        | -0.004 | 0.775       | -0.005 | 0.757      | -0.006 | 0.661     | -0.006 | 0.661 |
| Variaces          | Trust on SES      | Between       | 0.008  | 0.000        | 0.008  | 0.000       | 0.009  | 0.000      | 0.008  | 0.000     | 0.008  | 0.000 |
| Variaces          | Trust on lit.     | Between       | 0.006  | 0.000        | 0.006  | 0.000       | 0.006  | 0.000      | 0.007  | 0.000     | 0.007  | 0.000 |
| Variaces          | Trust on edu      | Between       | 0.006  | 0.000        | 0.006  | 0.000       | 0.019  | 0.000      | 0.007  | 0.000     | 0.007  | 0.000 |
| Residual.Variaces | Trust             | Between       | 0.006  | 0.000        | 0.006  | 0.000       | 0.006  | 0.000      | 0.006  | 0.000     | 0.006  | 0.000 |

| Parameters                               |               | Level   | Initial model |       | Without NEET |       | Difrent edu |       | SES=Income |       | SES=SIOPS |       |
|------------------------------------------|---------------|---------|---------------|-------|--------------|-------|-------------|-------|------------|-------|-----------|-------|
|                                          |               |         | est           | pval  | est          | pval  | est         | pval  | est        | pval  | est       | pval  |
| Residual.Variances                       | SES           | Between | 0.009         | 0.000 | 0.009        | 0.000 | 0.009       | 0.000 | 0.017      | 0.000 | 0.017     | 0.000 |
| Residual.Variances                       | Literacy      | Between | 0.015         | 0.000 | 0.015        | 0.000 | 0.018       | 0.000 | 0.015      | 0.000 | 0.015     | 0.000 |
| Effect through SES                       |               | Within  | 0.055         | 0.000 | 0.055        | 0.000 | 0.096       | 0.000 | 0.021      | 0.000 | 0.021     | 0.000 |
| Effect through literacy                  |               | Within  | 0.036         | 0.000 | 0.038        | 0.000 | 0.064       | 0.000 | 0.041      | 0.000 | 0.041     | 0.000 |
| Effect through SES                       |               | Between | 0.134         | 0.057 | 0.152        | 0.044 | 0.342       | 0.119 | 0.078      | 0.085 | 0.078     | 0.085 |
| Effect through literacy                  |               | Between | 0.053         | 0.221 | 0.063        | 0.190 | 0.087       | 0.295 | 0.050      | 0.233 | 0.050     | 0.233 |
| Contrast of the Within indirect effects  |               | Within  | 0.019         | 0.012 | 0.017        | 0.023 | 0.032       | 0.017 | -0.020     | 0.001 | -0.020    | 0.001 |
| Contrast of the Between indirect effects |               | Between | 0.081         | 0.362 | 0.090        | 0.352 | 0.255       | 0.317 | 0.028      | 0.688 | 0.028     | 0.688 |
| Total indirect                           |               | Within  | 0.091         | 0.000 | 0.092        | 0.000 | 0.159       | 0.000 | 0.061      | 0.000 | 0.061     | 0.000 |
| Total indirect                           |               | Between | 0.187         | 0.014 | 0.215        | 0.009 | 0.430       | 0.043 | 0.128      | 0.015 | 0.128     | 0.015 |
| Variance components (in SD)              | Trust on edu  | Between | 0.078         | 0.000 | 0.078        | 0.000 | 0.139       | 0.000 | 0.083      | 0.000 | 0.083     | 0.000 |
| Variance components (in SD)              | Trust on SES  | Between | 0.092         | 0.000 | 0.091        | 0.000 | 0.093       | 0.000 | 0.088      | 0.000 | 0.088     | 0.000 |
| Variance components (in SD)              | Trust on lit. | Between | 0.079         | 0.000 | 0.079        | 0.000 | 0.079       | 0.000 | 0.082      | 0.000 | 0.082     | 0.000 |
| Variance components (in SD)              | Trust         | Between | 0.076         | 0.000 | 0.077        | 0.000 | 0.078       | 0.000 | 0.076      | 0.000 | 0.076     | 0.000 |
| Variance components (in SD)              | SES           | Between | 0.096         | 0.000 | 0.095        | 0.000 | 0.096       | 0.000 | 0.131      | 0.000 | 0.131     | 0.000 |
| Variance components (in SD)              | Literacy      | Between | 0.124         | 0.000 | 0.124        | 0.000 | 0.133       | 0.000 | 0.124      | 0.000 | 0.124     | 0.000 |
| Total                                    |               | Within  | 0.211         | 0.000 | 0.218        | 0.000 | 0.414       | 0.000 | 0.210      | 0.000 | 0.210     | 0.000 |

**Table A9. Robustness checks for model 2a**

| Parameters         |               | Level   | Initial model |       | Without NEET |       | Difrent edu |       | SES=Income |       | SES=SIOPS |       |
|--------------------|---------------|---------|---------------|-------|--------------|-------|-------------|-------|------------|-------|-----------|-------|
|                    |               |         | est           | pval  | est          | pval  | est         | pval  | est        | pval  | est       | pval  |
| Trust on           | NEET          | Within  | -0.108        | 0.000 | ...          | ...   | -0.120      | 0.000 | -0.112     | 0.000 | -0.112    | 0.000 |
| Trust on           | MIG           | Within  | -0.059        | 0.010 | -0.059       | 0.010 | -0.056      | 0.006 | -0.064     | 0.005 | -0.064    | 0.005 |
| Trust on           | AGE           | Within  | 0.056         | 0.000 | 0.051        | 0.000 | 0.053       | 0.000 | 0.061      | 0.000 | 0.061     | 0.000 |
| Trust on           | FEMALE        | Within  | 0.133         | 0.000 | 0.129        | 0.000 | 0.129       | 0.000 | 0.126      | 0.000 | 0.126     | 0.000 |
| Trust on           | P_SES         | Within  | 0.070         | 0.000 | 0.070        | 0.000 | 0.073       | 0.000 | 0.075      | 0.000 | 0.075     | 0.000 |
| SES on             | Education     | Within  | 0.570         | 0.000 | 0.570        | 0.000 | 0.985       | 0.000 | 0.394      | 0.000 | 0.394     | 0.000 |
| Literacy on        | Education     | Within  | 0.507         | 0.000 | 0.507        | 0.000 | 0.788       | 0.000 | 0.507      | 0.000 | 0.507     | 0.000 |
| SES with           | Literacy      | Within  | 0.171         | 0.000 | 0.171        | 0.000 | 0.236       | 0.000 | 0.159      | 0.000 | 0.159     | 0.000 |
| Residual.Variances | Trust         | Within  | 0.849         | 0.000 | 0.849        | 0.000 | 0.848       | 0.000 | 0.852      | 0.000 | 0.852     | 0.000 |
| Residual.Variances | SES           | Within  | 0.688         | 0.000 | 0.688        | 0.000 | 0.741       | 0.000 | 0.845      | 0.000 | 0.845     | 0.000 |
| Residual.Variances | Literacy      | Within  | 0.655         | 0.000 | 0.655        | 0.000 | 0.732       | 0.000 | 0.655      | 0.000 | 0.655     | 0.000 |
| Trust on SES on    | DIVERSITY     | Between | -0.001        | 0.948 | -0.001       | 0.891 | -0.002      | 0.819 | 0.002      | 0.571 | 0.002     | 0.571 |
| Trust on lit. on   | DIVERSITY     | Between | 0.000         | 0.985 | 0.000        | 0.995 | -0.003      | 0.879 | 0.000      | 0.981 | 0.000     | 0.981 |
| Trust on edu on    | DIVERSITY     | Between | 0.005         | 0.489 | 0.005        | 0.491 | 0.012       | 0.249 | -0.001     | 0.938 | -0.001    | 0.938 |
| Trust on           | DIVERSITY     | Between | 0.083         | 0.001 | 0.084        | 0.001 | 0.031       | 0.276 | 0.066      | 0.013 | 0.066     | 0.013 |
| Trust on           | SES           | Between | -0.275        | 0.340 | -0.257       | 0.376 | -0.752      | 0.020 | -0.333     | 0.091 | -0.333    | 0.091 |
| Trust on           | Literacy      | Between | 0.651         | 0.002 | 0.648        | 0.003 | 0.683       | 0.000 | 0.615      | 0.003 | 0.615     | 0.003 |
| Trust on           | Education     | Between | -0.213        | 0.115 | -0.206       | 0.124 | 1.416       | 0.000 | -0.206     | 0.092 | -0.206    | 0.092 |
| SES on             | Education     | Between | 0.098         | 0.322 | 0.095        | 0.333 | 0.653       | 0.014 | 0.119      | 0.275 | 0.119     | 0.275 |
| Literacy on        | Education     | Between | 0.109         | 0.377 | 0.098        | 0.399 | -0.319      | 0.357 | 0.162      | 0.199 | 0.162     | 0.199 |
| Trust on edu with  | SES           | Between | 0.000         | 0.992 | 0.000        | 0.967 | 0.004       | 0.025 | -0.001     | 0.567 | -0.001    | 0.567 |
| Trust on edu with  | Literacy      | Between | 0.008         | 0.007 | 0.008        | 0.008 | 0.004       | 0.164 | 0.007      | 0.007 | 0.007     | 0.007 |
| Trust on edu with  | Trust         | Between | 0.005         | 0.024 | 0.005        | 0.025 | 0.010       | 0.002 | 0.006      | 0.026 | 0.006     | 0.026 |
| SES with           | Literacy      | Between | 0.009         | 0.091 | 0.008        | 0.102 | 0.014       | 0.017 | 0.007      | 0.154 | 0.007     | 0.154 |
| Intercepts         | Trust         | Between | -0.025        | 0.590 | -0.026       | 0.574 | -0.029      | 0.483 | -0.022     | 0.621 | -0.022    | 0.621 |
| Intercepts         | SES           | Between | 0.034         | 0.170 | 0.034        | 0.169 | 0.028       | 0.201 | 0.026      | 0.376 | 0.026     | 0.376 |
| Intercepts         | Literacy      | Between | 0.041         | 0.401 | 0.041        | 0.393 | 0.048       | 0.315 | 0.039      | 0.423 | 0.039     | 0.423 |
| Intercepts         | Trust on SES  | Between | 0.099         | 0.000 | 0.099        | 0.000 | 0.096       | 0.000 | 0.055      | 0.000 | 0.055     | 0.000 |
| Intercepts         | Trust on lit. | Between | 0.072         | 0.000 | 0.075        | 0.000 | 0.080       | 0.000 | 0.082      | 0.000 | 0.082     | 0.000 |
| Intercepts         | Trust on edu  | Between | 0.116         | 0.000 | 0.119        | 0.000 | 0.226       | 0.000 | 0.145      | 0.000 | 0.145     | 0.000 |

| Parameters                               |               | Level   | Initial model |       | Without NEET |       | Difrent edu |       | SES=Income |       | SES=SIOPS |       |
|------------------------------------------|---------------|---------|---------------|-------|--------------|-------|-------------|-------|------------|-------|-----------|-------|
|                                          |               |         | est           | pval  | est          | pval  | est         | pval  | est        | pval  | est       | pval  |
| Residual.Variances                       | Trust         | Between | 0.057         | 0.001 | 0.057        | 0.001 | 0.046       | 0.002 | 0.055      | 0.001 | 0.055     | 0.001 |
| Residual.Variances                       | SES           | Between | 0.019         | 0.004 | 0.019        | 0.004 | 0.016       | 0.003 | 0.028      | 0.008 | 0.028     | 0.008 |
| Residual.Variances                       | Literacy      | Between | 0.066         | 0.026 | 0.066        | 0.027 | 0.072       | 0.033 | 0.066      | 0.024 | 0.066     | 0.024 |
| Residual.Variances                       | Trust on SES  | Between | 0.002         | 0.000 | 0.002        | 0.000 | 0.002       | 0.000 | 0.001      | 0.005 | 0.001     | 0.005 |
| Residual.Variances                       | Trust on lit. | Between | 0.004         | 0.001 | 0.004        | 0.000 | 0.005       | 0.001 | 0.005      | 0.000 | 0.005     | 0.000 |
| Residual.Variances                       | Trust on edu  | Between | 0.003         | 0.000 | 0.003        | 0.000 | 0.006       | 0.001 | 0.003      | 0.000 | 0.003     | 0.000 |
| Effect through SES                       |               | Within  | 0.056         | 0.000 | 0.057        | 0.000 | 0.095       | 0.000 | 0.022      | 0.000 | 0.022     | 0.000 |
| Effect through literacy                  |               | Within  | 0.037         | 0.000 | 0.038        | 0.000 | 0.063       | 0.000 | 0.042      | 0.000 | 0.042     | 0.000 |
| Effect through SES                       |               | Between | -0.027        | 0.536 | -0.024       | 0.556 | -0.492      | 0.143 | -0.040     | 0.411 | -0.040    | 0.411 |
| Effect through literacy                  |               | Between | 0.071         | 0.325 | 0.064        | 0.351 | -0.218      | 0.340 | 0.099      | 0.126 | 0.099     | 0.126 |
| Contrast of the Within indirect effects  |               | Within  | 0.020         | 0.012 | 0.019        | 0.018 | 0.032       | 0.019 | -0.020     | 0.006 | -0.020    | 0.006 |
| Contrast of the Between indirect effects |               | Between | -0.098        | 0.331 | -0.088       | 0.353 | -0.274      | 0.522 | -0.139     | 0.163 | -0.139    | 0.163 |
| Total indirect                           |               | Within  | 0.093         | 0.000 | 0.095        | 0.000 | 0.158       | 0.000 | 0.064      | 0.000 | 0.064     | 0.000 |
| Total indirect                           |               | Between | 0.044         | 0.490 | 0.039        | 0.523 | -0.709      | 0.064 | 0.059      | 0.291 | 0.059     | 0.291 |
| Variance components (SD)                 | Trust on edu  | Between | 0.052         | 0.000 | 0.052        | 0.000 | 0.074       | 0.000 | 0.056      | 0.000 | 0.056     | 0.000 |
| Variance components (SD)                 | Trust on SES  | Between | 0.044         | 0.000 | 0.044        | 0.000 | 0.045       | 0.000 | 0.035      | 0.000 | 0.035     | 0.000 |
| Variance components (SD)                 | Trust on lit. | Between | 0.064         | 0.000 | 0.064        | 0.000 | 0.067       | 0.000 | 0.068      | 0.000 | 0.068     | 0.000 |
| Variance components (SD)                 | Trust         | Between | 0.239         | 0.000 | 0.239        | 0.000 | 0.214       | 0.000 | 0.234      | 0.000 | 0.234     | 0.000 |
| Variance components (SD)                 | SES           | Between | 0.137         | 0.000 | 0.136        | 0.000 | 0.125       | 0.000 | 0.167      | 0.000 | 0.167     | 0.000 |
| Variance components (SD)                 | Literacy      | Between | 0.258         | 0.000 | 0.256        | 0.000 | 0.268       | 0.000 | 0.256      | 0.000 | 0.256     | 0.000 |
| Total                                    |               | Within  | 0.209         | 0.000 | 0.214        | 0.000 | 0.384       | 0.000 | 0.209      | 0.000 | 0.209     | 0.000 |

**Table A10. Robustness checks for model 2b**

| Parameters        |           | Level   | Initial model |       | Without NEET |       | Difrent edu |       | SES=Income |       | SES=SIOPS |       |
|-------------------|-----------|---------|---------------|-------|--------------|-------|-------------|-------|------------|-------|-----------|-------|
|                   |           |         | est           | pval  | est          | pval  | est         | pval  | est        | pval  | est       | pval  |
| Trust on          | NEET      | Within  | -0.107        | 0.000 | ...          | ...   | -0.120      | 0.000 | -0.112     | 0.000 | -0.112    | 0.000 |
| Trust on          | MIG       | Within  | -0.059        | 0.010 | -0.059       | 0.010 | -0.056      | 0.006 | -0.064     | 0.005 | -0.064    | 0.005 |
| Trust on          | AGE       | Within  | 0.056         | 0.000 | 0.052        | 0.000 | 0.053       | 0.000 | 0.061      | 0.000 | 0.061     | 0.000 |
| Trust on          | FEMALE    | Within  | 0.133         | 0.000 | 0.129        | 0.000 | 0.129       | 0.000 | 0.126      | 0.000 | 0.126     | 0.000 |
| Trust on          | P_SES     | Within  | 0.070         | 0.000 | 0.071        | 0.000 | 0.073       | 0.000 | 0.075      | 0.000 | 0.075     | 0.000 |
| SES on            | Education | Within  | 0.570         | 0.000 | 0.570        | 0.000 | 0.985       | 0.000 | 0.394      | 0.000 | 0.394     | 0.000 |
| Literacy on       | Education | Within  | 0.507         | 0.000 | 0.507        | 0.000 | 0.788       | 0.000 | 0.507      | 0.000 | 0.507     | 0.000 |
| SES with          | Literacy  | Within  | 0.171         | 0.000 | 0.171        | 0.000 | 0.236       | 0.000 | 0.159      | 0.000 | 0.159     | 0.000 |
| Residual.Variaces | Trust     | Within  | 0.849         | 0.000 | 0.849        | 0.000 | 0.848       | 0.000 | 0.852      | 0.000 | 0.852     | 0.000 |
| Residual.Variaces | SES       | Within  | 0.688         | 0.000 | 0.688        | 0.000 | 0.741       | 0.000 | 0.845      | 0.000 | 0.845     | 0.000 |
| Residual.Variaces | Literacy  | Within  | 0.655         | 0.000 | 0.655        | 0.000 | 0.732       | 0.000 | 0.655      | 0.000 | 0.655     | 0.000 |
| Trust on SES      | DIVERSITY | Between | 0.002         | 0.817 | 0.002        | 0.861 | 0.002       | 0.864 | 0.003      | 0.493 | 0.003     | 0.493 |
| Trust on SES      | GDP       | Between | -0.001        | 0.914 | -0.002       | 0.877 | 0.000       | 0.998 | -0.001     | 0.826 | -0.001    | 0.826 |
| Trust on SES      | GINI      | Between | -0.006        | 0.626 | -0.006       | 0.634 | -0.010      | 0.328 | -0.001     | 0.918 | -0.001    | 0.918 |
| Trust on lit.     | DIVERSITY | Between | 0.015         | 0.050 | 0.015        | 0.054 | 0.012       | 0.142 | 0.016      | 0.068 | 0.016     | 0.068 |
| Trust on lit.     | GDP       | Between | 0.005         | 0.712 | 0.005        | 0.708 | 0.008       | 0.584 | 0.006      | 0.719 | 0.006     | 0.719 |
| Trust on lit.     | GINI      | Between | -0.042        | 0.001 | -0.042       | 0.001 | -0.045      | 0.001 | -0.044     | 0.001 | -0.044    | 0.001 |
| Trust on edu on   | DIVERSITY | Between | -0.001        | 0.906 | -0.001       | 0.943 | 0.003       | 0.787 | -0.003     | 0.783 | -0.003    | 0.783 |
| Trust on edu on   | GDP       | Between | 0.022         | 0.035 | 0.022        | 0.038 | 0.049       | 0.000 | 0.022      | 0.060 | 0.022     | 0.060 |
| Trust on edu on   | GINI      | Between | -0.017        | 0.339 | -0.018       | 0.299 | -0.045      | 0.007 | -0.027     | 0.094 | -0.027    | 0.094 |
| Trust on          | DIVERSITY | Between | 0.038         | 0.350 | 0.039        | 0.338 | 0.010       | 0.827 | 0.032      | 0.464 | 0.032     | 0.464 |
| Trust on          | GDP       | Between | 0.117         | 0.007 | 0.117        | 0.007 | 0.106       | 0.003 | 0.108      | 0.012 | 0.108     | 0.012 |
| Trust on          | GINI      | Between | -0.012        | 0.854 | -0.010       | 0.881 | -0.083      | 0.156 | -0.008     | 0.893 | -0.008    | 0.893 |
| Trust on          | SES       | Between | -0.196        | 0.440 | -0.184       | 0.471 | -0.656      | 0.017 | -0.208     | 0.251 | -0.208    | 0.251 |
| Trust on          | Literacy  | Between | 0.490         | 0.070 | 0.494        | 0.064 | 0.363       | 0.080 | 0.481      | 0.055 | 0.481     | 0.055 |
| Trust on          | Education | Between | -0.205        | 0.099 | -0.202       | 0.103 | 1.237       | 0.002 | -0.198     | 0.069 | -0.198    | 0.069 |
| SES on            | Education | Between | 0.103         | 0.282 | 0.099        | 0.295 | 0.589       | 0.024 | 0.114      | 0.275 | 0.114     | 0.275 |
| Literacy on       | Education | Between | 0.186         | 0.301 | 0.174        | 0.299 | -0.484      | 0.164 | 0.232      | 0.163 | 0.232     | 0.163 |
| Trust on edu with | SES       | Between | 0.000         | 0.810 | 0.000        | 0.851 | 0.002       | 0.373 | 0.000      | 0.751 | 0.000     | 0.751 |
| Trust on edu with | Literacy  | Between | 0.003         | 0.350 | 0.003        | 0.319 | -0.007      | 0.326 | 0.001      | 0.831 | 0.001     | 0.831 |

| Parameters                               |               | Level   | Initial model |       | Without NEET |       | Difrent edu |       | SES=Income |       | SES=SIOPS |       |
|------------------------------------------|---------------|---------|---------------|-------|--------------|-------|-------------|-------|------------|-------|-----------|-------|
|                                          |               |         | est           | pval  | est          | pval  | est         | pval  | est        | pval  | est       | pval  |
| Trust on edu with                        | Trust         | Between | 0.003         | 0.047 | 0.003        | 0.047 | 0.006       | 0.003 | 0.005      | 0.019 | 0.005     | 0.019 |
| SES with                                 | Literacy      | Between | 0.009         | 0.086 | 0.008        | 0.097 | 0.014       | 0.018 | 0.007      | 0.146 | 0.007     | 0.146 |
| Intercepts                               | Trust         | Between | -0.031        | 0.489 | -0.032       | 0.477 | -0.028      | 0.481 | -0.029     | 0.494 | -0.029    | 0.494 |
| Intercepts                               | SES           | Between | 0.034         | 0.173 | 0.034        | 0.171 | 0.029       | 0.183 | 0.026      | 0.374 | 0.026     | 0.374 |
| Intercepts                               | Literacy      | Between | 0.038         | 0.446 | 0.039        | 0.436 | 0.050       | 0.297 | 0.037      | 0.461 | 0.037     | 0.461 |
| Intercepts                               | Trust on SES  | Between | 0.099         | 0.000 | 0.099        | 0.000 | 0.095       | 0.000 | 0.055      | 0.000 | 0.055     | 0.000 |
| Intercepts                               | Trust on lit. | Between | 0.070         | 0.000 | 0.073        | 0.000 | 0.077       | 0.000 | 0.080      | 0.000 | 0.080     | 0.000 |
| Intercepts                               | Trust on edu  | Between | 0.113         | 0.000 | 0.117        | 0.000 | 0.221       | 0.000 | 0.142      | 0.000 | 0.142     | 0.000 |
| Residual.Variiances                      | Trust         | Between | 0.048         | 0.000 | 0.048        | 0.000 | 0.037       | 0.000 | 0.047      | 0.000 | 0.047     | 0.000 |
| Residual.Variiances                      | SES           | Between | 0.019         | 0.004 | 0.019        | 0.004 | 0.016       | 0.003 | 0.028      | 0.008 | 0.028     | 0.008 |
| Residual.Variiances                      | Literacy      | Between | 0.065         | 0.022 | 0.065        | 0.023 | 0.072       | 0.034 | 0.065      | 0.023 | 0.065     | 0.023 |
| Residual.Variiances                      | Trust on SES  | Between | 0.002         | 0.000 | 0.002        | 0.000 | 0.002       | 0.000 | 0.001      | 0.006 | 0.001     | 0.006 |
| Residual.Variiances                      | Trust on lit. | Between | 0.003         | 0.001 | 0.003        | 0.000 | 0.003       | 0.001 | 0.003      | 0.000 | 0.003     | 0.000 |
| Residual.Variiances                      | Trust on edu  | Between | 0.002         | 0.001 | 0.002        | 0.001 | 0.004       | 0.009 | 0.002      | 0.000 | 0.002     | 0.000 |
| Effect through SES                       |               | Within  | 0.056         | 0.000 | 0.056        | 0.000 | 0.094       | 0.000 | 0.022      | 0.000 | 0.022     | 0.000 |
| Effect through literacy                  |               | Within  | 0.036         | 0.000 | 0.037        | 0.000 | 0.061       | 0.000 | 0.041      | 0.000 | 0.041     | 0.000 |
| Effect through SES                       |               | Between | -0.020        | 0.556 | -0.018       | 0.577 | -0.386      | 0.155 | -0.024     | 0.468 | -0.024    | 0.468 |
| Effect through literacy                  |               | Between | 0.091         | 0.144 | 0.086        | 0.149 | -0.176      | 0.198 | 0.111      | 0.070 | 0.111     | 0.070 |
| Contrast of the Within indirect effects  |               | Within  | 0.021         | 0.005 | 0.020        | 0.008 | 0.033       | 0.010 | -0.019     | 0.005 | -0.019    | 0.005 |
| Contrast of the Between indirect effects |               | Between | -0.111        | 0.164 | -0.104       | 0.170 | -0.210      | 0.548 | -0.135     | 0.083 | -0.135    | 0.083 |
| Total indirect                           |               | Within  | 0.092         | 0.000 | 0.093        | 0.000 | 0.155       | 0.000 | 0.062      | 0.000 | 0.062     | 0.000 |
| Total indirect                           |               | Between | 0.071         | 0.244 | 0.068        | 0.251 | -0.562      | 0.024 | 0.088      | 0.143 | 0.088     | 0.143 |
| Variance components (SD)                 | Trust on edu  | Between | 0.039         | 0.000 | 0.039        | 0.000 | 0.064       | 0.000 | 0.042      | 0.000 | 0.042     | 0.000 |
| Variance components (SD)                 | Trust on SES  | Between | 0.044         | 0.000 | 0.043        | 0.000 | 0.044       | 0.000 | 0.035      | 0.000 | 0.035     | 0.000 |
| Variance components (SD)                 | Trust on lit. | Between | 0.051         | 0.000 | 0.051        | 0.000 | 0.053       | 0.000 | 0.055      | 0.000 | 0.055     | 0.000 |
| Variance components (SD)                 | Trust         | Between | 0.219         | 0.000 | 0.220        | 0.000 | 0.192       | 0.000 | 0.218      | 0.000 | 0.218     | 0.000 |
| Variance components (SD)                 | SES           | Between | 0.137         | 0.000 | 0.136        | 0.000 | 0.125       | 0.000 | 0.167      | 0.000 | 0.167     | 0.000 |
| Variance components (SD)                 | Literacy      | Between | 0.255         | 0.000 | 0.254        | 0.000 | 0.268       | 0.000 | 0.255      | 0.000 | 0.255     | 0.000 |
| Total                                    |               | Within  | 0.205         | 0.000 | 0.210        | 0.000 | 0.376       | 0.000 | 0.205      | 0.000 | 0.205     | 0.000 |

**Table A11. Robustness checks for model 2c**

| Parameters         |               | Level   | Initial model |       | Without NEET |       | Different edu |       | SES=Income |       | SES=SIOPS |       |
|--------------------|---------------|---------|---------------|-------|--------------|-------|---------------|-------|------------|-------|-----------|-------|
|                    |               |         | est           | pval  | est          | pval  | est           | pval  | est        | pval  | est       | pval  |
| Trust on           | NEET          | Within  | -0.108        | 0.000 | ...          | ...   | -0.120        | 0.000 | -0.112     | 0.000 | -0.112    | 0.000 |
| Trust on           | MIG           | Within  | -0.059        | 0.010 | -0.059       | 0.010 | -0.056        | 0.006 | -0.064     | 0.006 | -0.064    | 0.006 |
| Trust on           | AGE           | Within  | 0.056         | 0.000 | 0.051        | 0.000 | 0.053         | 0.000 | 0.061      | 0.000 | 0.061     | 0.000 |
| Trust on           | FEMALE        | Within  | 0.133         | 0.000 | 0.129        | 0.000 | 0.129         | 0.000 | 0.126      | 0.000 | 0.126     | 0.000 |
| Trust on           | P_SES         | Within  | 0.070         | 0.000 | 0.070        | 0.000 | 0.073         | 0.000 | 0.075      | 0.000 | 0.075     | 0.000 |
| SES on             | Education     | Within  | 0.570         | 0.000 | 0.570        | 0.000 | 0.985         | 0.000 | 0.394      | 0.000 | 0.394     | 0.000 |
| Literacy on        | Education     | Within  | 0.507         | 0.000 | 0.507        | 0.000 | 0.788         | 0.000 | 0.507      | 0.000 | 0.507     | 0.000 |
| SES with           | Literacy      | Within  | 0.171         | 0.000 | 0.171        | 0.000 | 0.236         | 0.000 | 0.159      | 0.000 | 0.159     | 0.000 |
| Residual Variances | Trust         | Within  | 0.849         | 0.000 | 0.849        | 0.000 | 0.848         | 0.000 | 0.852      | 0.000 | 0.852     | 0.000 |
| Residual Variances | SES           | Within  | 0.688         | 0.000 | 0.688        | 0.000 | 0.741         | 0.000 | 0.845      | 0.000 | 0.845     | 0.000 |
| Residual Variances | Literacy      | Within  | 0.655         | 0.000 | 0.655        | 0.000 | 0.732         | 0.000 | 0.655      | 0.000 | 0.655     | 0.000 |
| Trust on SES       | DIVERSITY     | Between | -0.003        | 0.700 | -0.004       | 0.614 | -0.004        | 0.667 | -0.001     | 0.843 | -0.001    | 0.843 |
| Trust on lit.      | DIVERSITY     | Between | 0.011         | 0.512 | 0.011        | 0.525 | 0.010         | 0.576 | 0.011      | 0.528 | 0.011     | 0.528 |
| Trust on edu on    | DIVERSITY     | Between | 0.010         | 0.228 | 0.011        | 0.223 | 0.022         | 0.114 | 0.005      | 0.657 | 0.005     | 0.657 |
| Trust on           | DIVERSITY     | Between | 0.055         | 0.161 | 0.056        | 0.154 | 0.010         | 0.799 | 0.032      | 0.471 | 0.032     | 0.471 |
| Trust on           | SES           | Between | -0.230        | 0.469 | -0.209       | 0.513 | -0.774        | 0.022 | -0.369     | 0.076 | -0.369    | 0.076 |
| Trust on           | Literacy      | Between | 0.592         | 0.002 | 0.589        | 0.003 | 0.664         | 0.000 | 0.565      | 0.002 | 0.565     | 0.002 |
| Trust on           | Education     | Between | -0.206        | 0.145 | -0.198       | 0.159 | 1.516         | 0.000 | -0.190     | 0.145 | -0.190    | 0.145 |
| SES on             | Education     | Between | 0.094         | 0.343 | 0.092        | 0.353 | 0.673         | 0.008 | 0.114      | 0.298 | 0.114     | 0.298 |
| Literacy on        | Education     | Between | 0.107         | 0.367 | 0.098        | 0.383 | -0.299        | 0.381 | 0.159      | 0.193 | 0.159     | 0.193 |
| Trust on edu with  | SES           | Between | 0.000         | 0.831 | 0.000        | 0.814 | 0.004         | 0.014 | 0.000      | 0.819 | 0.000     | 0.819 |
| Trust on edu with  | Literacy      | Between | 0.008         | 0.002 | 0.008        | 0.002 | 0.005         | 0.154 | 0.008      | 0.002 | 0.008     | 0.002 |
| Trust on edu with  | Trust         | Between | 0.005         | 0.038 | 0.005        | 0.040 | 0.010         | 0.003 | 0.006      | 0.038 | 0.006     | 0.038 |
| SES with           | Literacy      | Between | 0.009         | 0.090 | 0.008        | 0.101 | 0.014         | 0.016 | 0.007      | 0.152 | 0.007     | 0.152 |
| Intercepts         | Trust         | Between | -0.025        | 0.611 | -0.026       | 0.593 | -0.029        | 0.492 | -0.020     | 0.674 | -0.020    | 0.674 |
| Intercepts         | SES           | Between | 0.034         | 0.169 | 0.034        | 0.167 | 0.028         | 0.207 | 0.026      | 0.373 | 0.026     | 0.373 |
| Intercepts         | Literacy      | Between | 0.041         | 0.402 | 0.041        | 0.394 | 0.048         | 0.316 | 0.039      | 0.422 | 0.039     | 0.422 |
| Intercepts         | Trust on SES  | Between | 0.099         | 0.000 | 0.099        | 0.000 | 0.096         | 0.000 | 0.055      | 0.000 | 0.055     | 0.000 |
| Intercepts         | Trust on lit. | Between | 0.072         | 0.000 | 0.075        | 0.000 | 0.080         | 0.000 | 0.082      | 0.000 | 0.082     | 0.000 |
| Intercepts         | Trust on edu  | Between | 0.116         | 0.000 | 0.119        | 0.000 | 0.226         | 0.000 | 0.145      | 0.000 | 0.145     | 0.000 |

| Parameters                               |               | Level   | Initial model |       | Without NEET |       | Difrent edu |       | SES=Income |       | SES=SIOPS |       |
|------------------------------------------|---------------|---------|---------------|-------|--------------|-------|-------------|-------|------------|-------|-----------|-------|
|                                          |               |         | est           | pval  | est          | pval  | est         | pval  | est        | pval  | est       | pval  |
| Residual.Variances                       | Trust         | Between | 0.060         | 0.000 | 0.060        | 0.000 | 0.047       | 0.001 | 0.058      | 0.000 | 0.058     | 0.000 |
| Residual.Variances                       | SES           | Between | 0.019         | 0.004 | 0.019        | 0.004 | 0.016       | 0.002 | 0.028      | 0.008 | 0.028     | 0.008 |
| Residual.Variances                       | Literacy      | Between | 0.066         | 0.025 | 0.066        | 0.026 | 0.072       | 0.033 | 0.066      | 0.024 | 0.066     | 0.024 |
| Residual.Variances                       | Trust on SES  | Between | 0.002         | 0.000 | 0.002        | 0.000 | 0.002       | 0.000 | 0.001      | 0.006 | 0.001     | 0.006 |
| Residual.Variances                       | Trust on lit. | Between | 0.004         | 0.004 | 0.004        | 0.004 | 0.004       | 0.007 | 0.005      | 0.003 | 0.005     | 0.003 |
| Residual.Variances                       | Trust on edu  | Between | 0.003         | 0.000 | 0.003        | 0.000 | 0.005       | 0.000 | 0.003      | 0.000 | 0.003     | 0.000 |
| Effect through SES                       |               | Within  | 0.056         | 0.000 | 0.057        | 0.000 | 0.095       | 0.000 | 0.022      | 0.000 | 0.022     | 0.000 |
| Effect through literacy                  |               | Within  | 0.037         | 0.000 | 0.038        | 0.000 | 0.063       | 0.000 | 0.042      | 0.000 | 0.042     | 0.000 |
| Effect through SES                       |               | Between | -0.022        | 0.609 | -0.019       | 0.634 | -0.521      | 0.142 | -0.042     | 0.418 | -0.042    | 0.418 |
| Effect through literacy                  |               | Between | 0.063         | 0.317 | 0.058        | 0.335 | -0.198      | 0.360 | 0.090      | 0.129 | 0.090     | 0.129 |
| Contrast of the Within indirect effects  |               | Within  | 0.020         | 0.009 | 0.019        | 0.015 | 0.032       | 0.016 | -0.020     | 0.005 | -0.020    | 0.005 |
| Contrast of the Between indirect effects |               | Between | -0.085        | 0.348 | -0.077       | 0.367 | -0.322      | 0.457 | -0.132     | 0.172 | -0.132    | 0.172 |
| Total indirect                           |               | Within  | 0.093         | 0.000 | 0.095        | 0.000 | 0.158       | 0.000 | 0.064      | 0.000 | 0.064     | 0.000 |
| Total indirect                           |               | Between | 0.042         | 0.472 | 0.038        | 0.493 | -0.719      | 0.070 | 0.048      | 0.391 | 0.048     | 0.391 |
| Variance components (SD)                 | Trust on edu  | Between | 0.052         | 0.000 | 0.052        | 0.000 | 0.074       | 0.000 | 0.056      | 0.000 | 0.056     | 0.000 |
| Variance components (SD)                 | Trust on SES  | Between | 0.045         | 0.000 | 0.044        | 0.000 | 0.045       | 0.000 | 0.036      | 0.000 | 0.036     | 0.000 |
| Variance components (SD)                 | Trust on lit. | Between | 0.063         | 0.000 | 0.064        | 0.000 | 0.067       | 0.000 | 0.067      | 0.000 | 0.067     | 0.000 |
| Variance components (SD)                 | Trust         | Between | 0.246         | 0.000 | 0.246        | 0.000 | 0.217       | 0.000 | 0.240      | 0.000 | 0.240     | 0.000 |
| Variance components (SD)                 | SES           | Between | 0.137         | 0.000 | 0.136        | 0.000 | 0.125       | 0.000 | 0.167      | 0.000 | 0.167     | 0.000 |
| Variance components (SD)                 | Literacy      | Between | 0.258         | 0.000 | 0.256        | 0.000 | 0.268       | 0.000 | 0.256      | 0.000 | 0.256     | 0.000 |
| Total                                    |               | Within  | 0.209         | 0.000 | 0.214        | 0.000 | 0.384       | 0.000 | 0.209      | 0.000 | 0.209     | 0.000 |



**Table A12. Robustness checks for model 2d**

| Parameters        |           | Level   | Initial model |       | Without NEET |       | Difrent edu |       | SES=Income |       | SES=SIOPS |       |
|-------------------|-----------|---------|---------------|-------|--------------|-------|-------------|-------|------------|-------|-----------|-------|
|                   |           |         | est           | pval  | est          | pval  | est         | pval  | est        | pval  | est       | pval  |
| Trust on          | NEET      | Within  | -0.107        | 0.000 | ...          | ...   | -0.120      | 0.000 | -0.112     | 0.000 | -0.112    | 0.000 |
| Trust on          | MIG       | Within  | -0.059        | 0.010 | -0.058       | 0.010 | -0.056      | 0.006 | -0.064     | 0.006 | -0.064    | 0.006 |
| Trust on          | AGE       | Within  | 0.056         | 0.000 | 0.052        | 0.000 | 0.053       | 0.000 | 0.061      | 0.000 | 0.061     | 0.000 |
| Trust on          | FEMALE    | Within  | 0.133         | 0.000 | 0.129        | 0.000 | 0.129       | 0.000 | 0.126      | 0.000 | 0.126     | 0.000 |
| Trust on          | P_SES     | Within  | 0.070         | 0.000 | 0.071        | 0.000 | 0.073       | 0.000 | 0.075      | 0.000 | 0.075     | 0.000 |
| SES on            | Education | Within  | 0.570         | 0.000 | 0.570        | 0.000 | 0.985       | 0.000 | 0.394      | 0.000 | 0.394     | 0.000 |
| Literacy on       | Education | Within  | 0.507         | 0.000 | 0.507        | 0.000 | 0.788       | 0.000 | 0.507      | 0.000 | 0.507     | 0.000 |
| SES with          | Literacy  | Within  | 0.171         | 0.000 | 0.171        | 0.000 | 0.236       | 0.000 | 0.159      | 0.000 | 0.159     | 0.000 |
| Residual.Variaces | Trust     | Within  | 0.849         | 0.000 | 0.849        | 0.000 | 0.848       | 0.000 | 0.852      | 0.000 | 0.852     | 0.000 |
| Residual.Variaces | SES       | Within  | 0.688         | 0.000 | 0.688        | 0.000 | 0.741       | 0.000 | 0.845      | 0.000 | 0.845     | 0.000 |
| Residual.Variaces | Literacy  | Within  | 0.655         | 0.000 | 0.655        | 0.000 | 0.732       | 0.000 | 0.655      | 0.000 | 0.655     | 0.000 |
| Trust on SES      | DIVERSITY | Between | -0.002        | 0.836 | -0.003       | 0.765 | -0.002      | 0.846 | -0.002     | 0.798 | -0.002    | 0.798 |
| Trust on SES      | GDP       | Between | 0.001         | 0.946 | 0.001        | 0.957 | 0.001       | 0.896 | 0.000      | 0.948 | 0.000     | 0.948 |
| Trust on SES      | GINI      | Between | -0.004        | 0.694 | -0.004       | 0.708 | -0.008      | 0.344 | 0.001      | 0.863 | 0.001     | 0.863 |
| Trust on lit.     | DIVERSITY | Between | 0.024         | 0.007 | 0.024        | 0.007 | 0.024       | 0.005 | 0.025      | 0.014 | 0.025     | 0.014 |
| Trust on lit.     | GDP       | Between | -0.002        | 0.918 | -0.001       | 0.921 | 0.001       | 0.957 | -0.001     | 0.945 | -0.001    | 0.945 |
| Trust on lit.     | GINI      | Between | -0.043        | 0.000 | -0.044       | 0.000 | -0.047      | 0.000 | -0.045     | 0.001 | -0.045    | 0.001 |
| Trust on edu on   | DIVERSITY | Between | 0.003         | 0.760 | 0.003        | 0.687 | 0.006       | 0.669 | 0.000      | 0.965 | 0.000     | 0.965 |
| Trust on edu on   | GDP       | Between | 0.020         | 0.071 | 0.020        | 0.080 | 0.048       | 0.000 | 0.021      | 0.095 | 0.021     | 0.095 |
| Trust on edu on   | GINI      | Between | -0.017        | 0.330 | -0.018       | 0.288 | -0.044      | 0.008 | -0.028     | 0.087 | -0.028    | 0.087 |
| Trust on          | DIVERSITY | Between | -0.013        | 0.828 | -0.011       | 0.848 | -0.037      | 0.513 | -0.028     | 0.658 | -0.028    | 0.658 |
| Trust on          | GDP       | Between | 0.138         | 0.009 | 0.137        | 0.009 | 0.127       | 0.003 | 0.129      | 0.012 | 0.129     | 0.012 |
| Trust on          | GINI      | Between | 0.000         | 0.997 | 0.003        | 0.961 | -0.078      | 0.143 | 0.008      | 0.885 | 0.008     | 0.885 |
| Trust on          | SES       | Between | -0.209        | 0.428 | -0.194       | 0.464 | -0.716      | 0.009 | -0.307     | 0.086 | -0.307    | 0.086 |
| Trust on          | Literacy  | Between | 0.458         | 0.055 | 0.464        | 0.050 | 0.339       | 0.053 | 0.465      | 0.027 | 0.465     | 0.027 |
| Trust on          | Education | Between | -0.196        | 0.102 | -0.193       | 0.107 | 1.322       | 0.001 | -0.179     | 0.088 | -0.179    | 0.088 |
| SES on            | Education | Between | 0.101         | 0.291 | 0.098        | 0.305 | 0.591       | 0.022 | 0.112      | 0.279 | 0.112     | 0.279 |
| Literacy on       | Education | Between | 0.183         | 0.310 | 0.171        | 0.307 | -0.483      | 0.168 | 0.231      | 0.165 | 0.231     | 0.165 |
| Trust on edu with | SES       | Between | 0.000         | 0.879 | 0.000        | 0.925 | 0.002       | 0.357 | 0.000      | 0.859 | 0.000     | 0.859 |
| Trust on edu with | Literacy  | Between | 0.003         | 0.334 | 0.003        | 0.301 | -0.007      | 0.361 | 0.001      | 0.814 | 0.001     | 0.814 |

| Parameters                               |               | Level   | Initial model |       | Without NEET |       | Difrent edu |       | SES=Income |       | SES=SIOPS |       |
|------------------------------------------|---------------|---------|---------------|-------|--------------|-------|-------------|-------|------------|-------|-----------|-------|
|                                          |               |         | est           | pval  | est          | pval  | est         | pval  | est        | pval  | est       | pval  |
| Trust on edu with                        | Trust         | Between | 0.003         | 0.047 | 0.003        | 0.047 | 0.006       | 0.002 | 0.005      | 0.018 | 0.005     | 0.018 |
| SES with                                 | Literacy      | Between | 0.009         | 0.086 | 0.008        | 0.097 | 0.014       | 0.018 | 0.007      | 0.146 | 0.007     | 0.146 |
| Intercepts                               | Trust         | Between | -0.030        | 0.499 | -0.031       | 0.486 | -0.027      | 0.485 | -0.027     | 0.532 | -0.027    | 0.532 |
| Intercepts                               | SES           | Between | 0.034         | 0.173 | 0.034        | 0.171 | 0.029       | 0.183 | 0.026      | 0.374 | 0.026     | 0.374 |
| Intercepts                               | Literacy      | Between | 0.038         | 0.445 | 0.039        | 0.435 | 0.050       | 0.296 | 0.037      | 0.461 | 0.037     | 0.461 |
| Intercepts                               | Trust on SES  | Between | 0.099         | 0.000 | 0.099        | 0.000 | 0.095       | 0.000 | 0.055      | 0.000 | 0.055     | 0.000 |
| Intercepts                               | Trust on lit. | Between | 0.070         | 0.000 | 0.073        | 0.000 | 0.078       | 0.000 | 0.080      | 0.000 | 0.080     | 0.000 |
| Intercepts                               | Trust on edu  | Between | 0.113         | 0.000 | 0.117        | 0.000 | 0.221       | 0.000 | 0.142      | 0.000 | 0.142     | 0.000 |
| Residual.Variiances                      | Trust         | Between | 0.049         | 0.000 | 0.049        | 0.000 | 0.036       | 0.000 | 0.048      | 0.000 | 0.048     | 0.000 |
| Residual.Variiances                      | SES           | Between | 0.019         | 0.004 | 0.019        | 0.004 | 0.016       | 0.003 | 0.028      | 0.008 | 0.028     | 0.008 |
| Residual.Variiances                      | Literacy      | Between | 0.065         | 0.022 | 0.065        | 0.023 | 0.072       | 0.034 | 0.065      | 0.023 | 0.065     | 0.023 |
| Residual.Variiances                      | Trust on SES  | Between | 0.002         | 0.000 | 0.002        | 0.000 | 0.002       | 0.000 | 0.001      | 0.006 | 0.001     | 0.006 |
| Residual.Variiances                      | Trust on lit. | Between | 0.002         | 0.000 | 0.002        | 0.000 | 0.002       | 0.001 | 0.003      | 0.000 | 0.003     | 0.000 |
| Residual.Variiances                      | Trust on edu  | Between | 0.002         | 0.002 | 0.002        | 0.002 | 0.004       | 0.010 | 0.002      | 0.000 | 0.002     | 0.000 |
| Effect through SES                       |               | Within  | 0.056         | 0.000 | 0.056        | 0.000 | 0.094       | 0.000 | 0.022      | 0.000 | 0.022     | 0.000 |
| Effect through literacy                  |               | Within  | 0.036         | 0.000 | 0.037        | 0.000 | 0.061       | 0.000 | 0.041      | 0.000 | 0.041     | 0.000 |
| Effect through SES                       |               | Between | -0.021        | 0.555 | -0.019       | 0.580 | -0.423      | 0.127 | -0.035     | 0.377 | -0.035    | 0.377 |
| Effect through literacy                  |               | Between | 0.084         | 0.161 | 0.079        | 0.164 | -0.164      | 0.194 | 0.107      | 0.076 | 0.107     | 0.076 |
| Contrast of the Within indirect effects  |               | Within  | 0.020         | 0.004 | 0.019        | 0.007 | 0.033       | 0.009 | -0.019     | 0.003 | -0.019    | 0.003 |
| Contrast of the Between indirect effects |               | Between | -0.105        | 0.180 | -0.098       | 0.185 | -0.259      | 0.465 | -0.142     | 0.076 | -0.142    | 0.076 |
| Total indirect                           |               | Within  | 0.092         | 0.000 | 0.094        | 0.000 | 0.155       | 0.000 | 0.063      | 0.000 | 0.063     | 0.000 |
| Total indirect                           |               | Between | 0.063         | 0.294 | 0.060        | 0.297 | -0.587      | 0.016 | 0.073      | 0.251 | 0.073     | 0.251 |
| Variance components (SD)                 | Trust on edu  | Between | 0.040         | 0.000 | 0.039        | 0.000 | 0.064       | 0.000 | 0.042      | 0.000 | 0.042     | 0.000 |
| Variance components (SD)                 | Trust on SES  | Between | 0.044         | 0.000 | 0.043        | 0.000 | 0.044       | 0.000 | 0.035      | 0.000 | 0.035     | 0.000 |
| Variance components (SD)                 | Trust on Lit. | Between | 0.049         | 0.000 | 0.049        | 0.000 | 0.050       | 0.000 | 0.053      | 0.000 | 0.053     | 0.000 |
| Variance components (SD)                 | Trust         | Between | 0.221         | 0.000 | 0.222        | 0.000 | 0.190       | 0.000 | 0.218      | 0.000 | 0.218     | 0.000 |
| Variance components (SD)                 | SES           | Between | 0.137         | 0.000 | 0.136        | 0.000 | 0.125       | 0.000 | 0.167      | 0.000 | 0.167     | 0.000 |
| Variance components (SD)                 | Literacy      | Between | 0.255         | 0.000 | 0.254        | 0.000 | 0.268       | 0.000 | 0.255      | 0.000 | 0.255     | 0.000 |
| Total                                    |               | Within  | 0.205         | 0.000 | 0.210        | 0.000 | 0.376       | 0.000 | 0.205      | 0.000 | 0.205     | 0.000 |

**Table A13. Robustness checks for model 2e**

| Parameters         |               | Level   | Initial model |       | Without NEET |       | Difrent edu |       | SES=Income |       | SES=SIOPS |       |
|--------------------|---------------|---------|---------------|-------|--------------|-------|-------------|-------|------------|-------|-----------|-------|
|                    |               |         | est           | pval  | est          | pval  | est         | pval  | est        | pval  | est       | pval  |
| Trust on           | NEET          | Within  | -0.122        | 0.000 | ...          | ...   | -0.136      | 0.000 | -0.129     | 0.000 | -0.129    | 0.000 |
| Trust on           | MIG           | Within  | -0.055        | 0.006 | -0.055       | 0.006 | -0.053      | 0.005 | -0.062     | 0.002 | -0.062    | 0.002 |
| Trust on           | AGE           | Within  | 0.051         | 0.000 | 0.045        | 0.000 | 0.048       | 0.000 | 0.058      | 0.000 | 0.058     | 0.000 |
| Trust on           | FEMALE        | Within  | 0.128         | 0.000 | 0.124        | 0.000 | 0.125       | 0.000 | 0.123      | 0.000 | 0.123     | 0.000 |
| Trust on           | P_SES         | Within  | 0.060         | 0.000 | 0.060        | 0.000 | 0.064       | 0.000 | 0.065      | 0.000 | 0.065     | 0.000 |
| SES on             | Education     | Within  | 0.552         | 0.000 | 0.552        | 0.000 | 0.977       | 0.000 | 0.369      | 0.000 | 0.369     | 0.000 |
| Literacy on        | Education     | Within  | 0.468         | 0.000 | 0.468        | 0.000 | 0.743       | 0.000 | 0.468      | 0.000 | 0.468     | 0.000 |
| SES with           | Literacy      | Within  | 0.162         | 0.000 | 0.162        | 0.000 | 0.216       | 0.000 | 0.150      | 0.000 | 0.150     | 0.000 |
| Residual.Variances | Trust         | Within  | 0.840         | 0.000 | 0.841        | 0.000 | 0.839       | 0.000 | 0.843      | 0.000 | 0.843     | 0.000 |
| Residual.Variances | SES           | Within  | 0.686         | 0.000 | 0.686        | 0.000 | 0.730       | 0.000 | 0.847      | 0.000 | 0.847     | 0.000 |
| Residual.Variances | Literacy      | Within  | 0.626         | 0.000 | 0.626        | 0.000 | 0.689       | 0.000 | 0.627      | 0.000 | 0.627     | 0.000 |
| Trust on SES       | DIVERSITY     | Between | 0.013         | 0.262 | 0.012        | 0.280 | 0.018       | 0.138 | 0.003      | 0.775 | 0.003     | 0.775 |
| Trust on lit.      | DIVERSITY     | Between | 0.022         | 0.025 | 0.022        | 0.026 | 0.028       | 0.004 | 0.027      | 0.007 | 0.027     | 0.007 |
| Trust on edu on    | DIVERSITY     | Between | 0.018         | 0.062 | 0.018        | 0.067 | 0.003       | 0.856 | 0.021      | 0.028 | 0.021     | 0.028 |
| Trust on           | DIVERSITY     | Between | 0.002         | 0.844 | 0.002        | 0.804 | 0.002       | 0.803 | 0.002      | 0.797 | 0.002     | 0.797 |
| Trust on           | SES           | Between | 0.203         | 0.064 | 0.218        | 0.052 | 0.194       | 0.129 | 0.153      | 0.067 | 0.153     | 0.067 |
| Trust on           | Literacy      | Between | 0.135         | 0.165 | 0.142        | 0.142 | 0.110       | 0.265 | 0.130      | 0.175 | 0.130     | 0.175 |
| Trust on           | Education     | Between | -0.332        | 0.020 | -0.342       | 0.020 | -0.671      | 0.054 | -0.268     | 0.026 | -0.268    | 0.026 |
| SES on             | Education     | Between | 0.667         | 0.000 | 0.708        | 0.000 | 1.810       | 0.000 | 0.520      | 0.003 | 0.520     | 0.003 |
| Literacy on        | Education     | Between | 0.403         | 0.014 | 0.455        | 0.005 | 0.839       | 0.024 | 0.398      | 0.015 | 0.398     | 0.015 |
| Trust on edu with  | SES           | Between | 0.000         | 0.690 | 0.000        | 0.746 | 0.001       | 0.622 | 0.001      | 0.699 | 0.001     | 0.699 |
| Trust on edu with  | Literacy      | Between | 0.001         | 0.513 | 0.001        | 0.533 | 0.002       | 0.486 | 0.001      | 0.505 | 0.001     | 0.505 |
| Trust on edu with  | Trust         | Between | 0.000         | 0.767 | 0.000        | 0.778 | -0.001      | 0.758 | 0.000      | 0.658 | 0.000     | 0.658 |
| SES with           | Literacy      | Between | 0.003         | 0.073 | 0.003        | 0.083 | 0.005       | 0.021 | 0.004      | 0.105 | 0.004     | 0.105 |
| Intercepts         | Trust         | Between | -0.002        | 0.786 | -0.002       | 0.796 | -0.003      | 0.767 | -0.002     | 0.784 | -0.002    | 0.784 |
| Intercepts         | SES           | Between | -0.017        | 0.093 | -0.015       | 0.117 | -0.007      | 0.485 | -0.021     | 0.122 | -0.021    | 0.122 |
| Intercepts         | Literacy      | Between | -0.005        | 0.693 | -0.003       | 0.786 | -0.004      | 0.778 | -0.005     | 0.670 | -0.005    | 0.670 |
| Intercepts         | Trust on SES  | Between | 0.099         | 0.000 | 0.099        | 0.000 | 0.098       | 0.000 | 0.057      | 0.000 | 0.057     | 0.000 |
| Intercepts         | Trust on lit. | Between | 0.076         | 0.000 | 0.080        | 0.000 | 0.085       | 0.000 | 0.086      | 0.000 | 0.086     | 0.000 |
| Intercepts         | Trust on edu  | Between | 0.121         | 0.000 | 0.126        | 0.000 | 0.256       | 0.000 | 0.149      | 0.000 | 0.149     | 0.000 |

| Parameters                               | Level         | Initial model |       | Without NEET |       | Difrent edu |       | SES=Income |        | SES=SIOPS |        |       |
|------------------------------------------|---------------|---------------|-------|--------------|-------|-------------|-------|------------|--------|-----------|--------|-------|
|                                          |               | est           | pval  | est          | pval  | est         | pval  | est        | pval   | est       | pval   |       |
| Residual.Variances                       | Trust         | Between       | 0.006 | 0.000        | 0.006 | 0.000       | 0.006 | 0.000      | 0.006  | 0.000     | 0.006  | 0.000 |
| Residual.Variances                       | SES           | Between       | 0.009 | 0.000        | 0.009 | 0.000       | 0.009 | 0.000      | 0.017  | 0.000     | 0.017  | 0.000 |
| Residual.Variances                       | Literacy      | Between       | 0.015 | 0.000        | 0.015 | 0.000       | 0.018 | 0.000      | 0.015  | 0.000     | 0.015  | 0.000 |
| Residual.Variances                       | Trust on SES  | Between       | 0.008 | 0.000        | 0.008 | 0.000       | 0.008 | 0.000      | 0.008  | 0.000     | 0.008  | 0.000 |
| Residual.Variances                       | Trust on lit. | Between       | 0.006 | 0.000        | 0.006 | 0.000       | 0.006 | 0.000      | 0.006  | 0.000     | 0.006  | 0.000 |
| Residual.Variances                       | Trust on edu  | Between       | 0.006 | 0.000        | 0.006 | 0.000       | 0.019 | 0.000      | 0.007  | 0.000     | 0.007  | 0.000 |
| Effect through SES                       |               | Within        | 0.055 | 0.000        | 0.055 | 0.000       | 0.096 | 0.000      | 0.021  | 0.000     | 0.021  | 0.000 |
| Effect through literacy                  |               | Within        | 0.036 | 0.000        | 0.037 | 0.000       | 0.063 | 0.000      | 0.040  | 0.000     | 0.040  | 0.000 |
| Effect through SES                       |               | Between       | 0.136 | 0.065        | 0.154 | 0.052       | 0.352 | 0.122      | 0.079  | 0.090     | 0.079  | 0.090 |
| Effect through literacy                  |               | Between       | 0.055 | 0.214        | 0.065 | 0.183       | 0.092 | 0.287      | 0.052  | 0.224     | 0.052  | 0.224 |
| Contrast of the Within indirect effects  |               | Within        | 0.019 | 0.010        | 0.017 | 0.019       | 0.033 | 0.014      | -0.019 | 0.001     | -0.019 | 0.001 |
| Contrast of the Between indirect effects |               | Between       | 0.081 | 0.376        | 0.089 | 0.368       | 0.260 | 0.324      | 0.027  | 0.699     | 0.027  | 0.699 |
| Total indirect                           |               | Within        | 0.091 | 0.000        | 0.092 | 0.000       | 0.159 | 0.000      | 0.061  | 0.000     | 0.061  | 0.000 |
| Total indirect                           |               | Between       | 0.190 | 0.016        | 0.219 | 0.011       | 0.443 | 0.045      | 0.131  | 0.016     | 0.131  | 0.016 |
| Variance components (SD)                 | Trust on edu  | Between       | 0.076 | 0.000        | 0.076 | 0.000       | 0.138 | 0.000      | 0.081  | 0.000     | 0.081  | 0.000 |
| Variance components (SD)                 | Trust on SES  | Between       | 0.090 | 0.000        | 0.090 | 0.000       | 0.091 | 0.000      | 0.088  | 0.000     | 0.088  | 0.000 |
| Variance components (SD)                 | Trust on lit. | Between       | 0.075 | 0.000        | 0.075 | 0.000       | 0.074 | 0.000      | 0.077  | 0.000     | 0.077  | 0.000 |
| Variance components (SD)                 | Trust         | Between       | 0.076 | 0.000        | 0.077 | 0.000       | 0.078 | 0.000      | 0.075  | 0.000     | 0.075  | 0.000 |
| Variance components (SD)                 | SES           | Between       | 0.096 | 0.000        | 0.095 | 0.000       | 0.095 | 0.000      | 0.131  | 0.000     | 0.131  | 0.000 |
| Variance components (SD)                 | Literacy      | Between       | 0.124 | 0.000        | 0.124 | 0.000       | 0.133 | 0.000      | 0.124  | 0.000     | 0.124  | 0.000 |
| Total                                    |               | Within        | 0.212 | 0.000        | 0.218 | 0.000       | 0.415 | 0.000      | 0.210  | 0.000     | 0.210  | 0.000 |
